# Supplementary material for: Surface enhanced resonance Raman detection of a catalytic intermediate of DyP-type peroxidase
Source: Royal Society of Chemistry journal article supplement (doi:10.1039/c5cp01283j), 2015-01-01
Supplement: c5cp01283j1.pdf [file c5cp01283j1.pdf]

**Supporting information**

**Surface Enhanced Resonance Raman Detection of a Catalytic Intermediate of DyP-type Peroxidase**

Smilja Todorovic,<sup>\*a</sup> Peter Hildenbrandt<sup>b</sup> and Lígia O. Martins<sup>a</sup>

## Materials and Methods

The cloning and overexpression of ppDyP gene in *Escherichia coli* and protein purification followed previously optimised procedures.<sup>8</sup>

Silver supports for SERR experiments were electrochemically roughened and subsequently immersed into ethanolic solution of aminooctanethiol (AOT) and mercaptohexanol (MOH) in 1:3 (M/M) ratio for 16–24 h to form a self-assembled monolayer (SAM).<sup>9, 10</sup> Prior to SERR experiments, the SAM coated Ag supports were immersed for 10–15 min into 200  $\mu\text{L}$  of 50 mM Tris-HCl + 200mM NaCl, pH 7.6 buffer containing ca. 0.4  $\mu\text{M}$  PpDyP. The SERR experiments were performed using a homemade SERR cell. A rotating cuvette (from Hellma), containing 100  $\mu\text{M}$  PpDyP, was used for RR experiments.

Spectra were measured at RT with 413 nm line of krypton ion laser (Coherent Innova 302), using a confocal spectrograph (Jobin Yvon LabRam), equipped with a liquid N<sub>2</sub> cooled CCD camera; 5 and 1.1 mW laser power and 60 and 20 s accumulation time, were employed for the measurements of RR and SERR spectra, respectively. After polynomial baseline subtraction the spectra were subjected to component analysis as described previously, using a homemade software.<sup>9, 10</sup>

## Figures

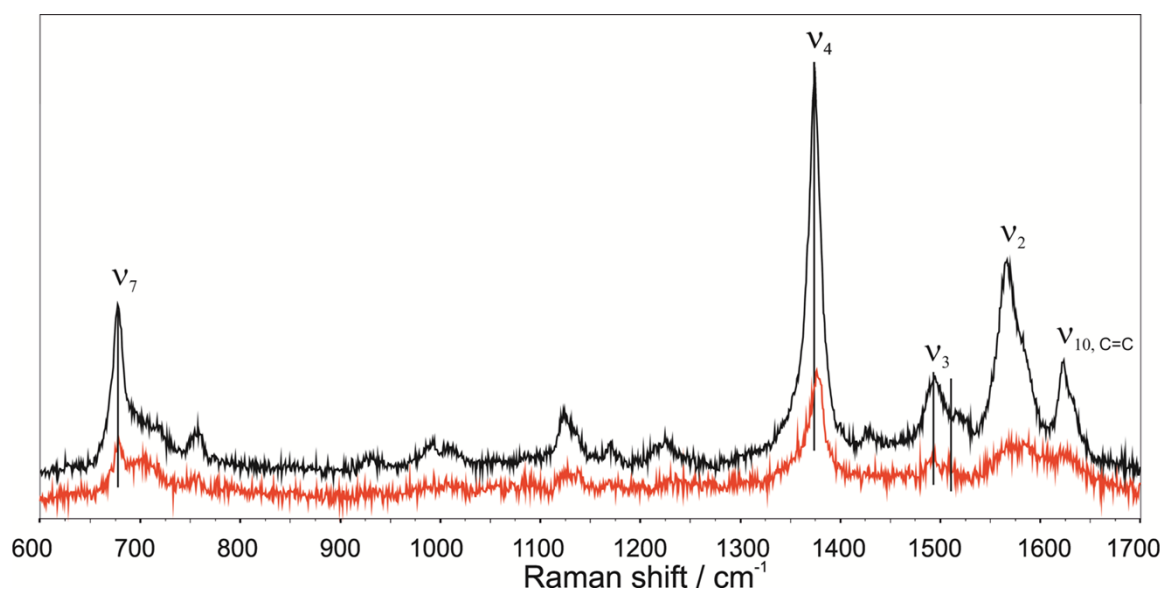

Figure SI 1. Experimental SERR spectra of ferric PpDyP immobilised on AOT/MOH SAM in the absence (black trace) and presence (red trace) of hydrogen peroxide. Spectra show unaltered frequency of  $\nu_7$  mode (which can be regarded as an internal standard) and upshifted  $\nu_4$  and  $\nu_3$  modes. Spectra were acquired from the same sample, under identical experimental conditions (laser power 1.1 mW, 20s accumulation time; co-addition of two spectra). It is noteworthy that there are no indications of Fe(IV)=O stretching mode in the low frequency region of the spectra; this mode has never been detected in HRP Cpd I, and appears at  $\sim 780\text{cm}^{-1}$  in Cpd II.<sup>14</sup>
